# Supplementary material for: Metal-Free Phosphated Mesoporous SiO2 as Catalyst for the Low-Temperature Conversion of SO2 to H2S in Hydrogen
Source: MDPI journal article supplement (doi:10.3390/nano11092440), 2021-09-18
Supplement: s1 [file s1]

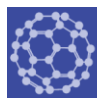

## SUPPORTING INFORMATION

# Metal-Free Phosphated Mesoporous SiO<sub>2</sub> as Catalyst for the Low-Temperature Conversion of SO<sub>2</sub> to H<sub>2</sub>S in Hydrogen

Xinnan Lu <sup>1,2,\*</sup>, Safa Gaber <sup>2,3</sup>, Mark A. Baker <sup>4</sup>, Steven J. Hinder <sup>4</sup> and Kyriaki Polychronopoulou <sup>2,3,\*</sup>

<sup>1</sup> Department of Chemical Engineering, Khalifa University, Abu Dhabi P.O. Box 127788, United Arab Emirates

<sup>2</sup> Department of Mechanical Engineering, Khalifa University, Abu Dhabi P.O. Box 127788, United Arab Emirates; saagaber90@gmail.com

<sup>3</sup> Center for Catalysis and Separations, Khalifa University, Abu Dhabi P.O. Box 127788, United Arab Emirates

<sup>4</sup> The Surface Analysis Laboratory, Faculty of Engineering and Physical Sciences, University of Surrey, Guildford GU2 7XH, UK; m.baker@surrey.ac.uk (M.A.B.); s.hinder@surrey.ac.uk (S.J.H.)

\* Correspondence: xinnan.lu@ku.ac.ae (X.L.); kyriaki.polychrono@ku.ac.ae (K.P.)

**Citation:** Lu, X.; Gaber, S.; Baker, M.A.; Hinder, S. J.; Polychronopoulou, K. Metal-Free Phosphated Mesoporous SiO<sub>2</sub> as Catalyst for the Low-Temperature Conversion of SO<sub>2</sub> to H<sub>2</sub>S in Hydrogen. *Nanomaterials* **2021**, *11*, 2440. <https://doi.org/10.3390/nano11092440>

Academic Editor(s): Detlef W. Bahnemann

Received: 05 August 2021

Accepted: 08 September 2021

Published: 18 September 2021

**Publisher's Note:** MDPI stays neutral with regard to jurisdictional claims in published maps and institutional affiliations.

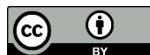

**Copyright:** © 2021 by the authors. Licensee MDPI, Basel, Switzerland. This article is an open access article distributed under the terms and conditions of the Creative Commons Attribution (CC BY) license (<http://creativecommons.org/licenses/by/4.0/>).

**Table S1.** XPS elemental concentrations for uf-P@m-SiO<sub>2</sub>-cal (A: fresh), and uf-P@m-SiO<sub>2</sub> (B: fresh, and C: used).

| Element | Atomic %                     |                                 |                                |
|---------|------------------------------|---------------------------------|--------------------------------|
|         | uf-P@m-SiO <sub>2</sub> -cal | uf-P@m-SiO <sub>2</sub> (Fresh) | uf-P@m-SiO <sub>2</sub> (Used) |
| C       | 20.3                         | 20.6                            | 16.7                           |
| N       | 0.9                          | 0.9                             | 0.7                            |
| O       | 53.4                         | 53.1                            | 56.0                           |
| Si      | 25.2                         | 25.3                            | 26.5                           |
| P       | 0.1                          | 0.1                             | 0.1                            |

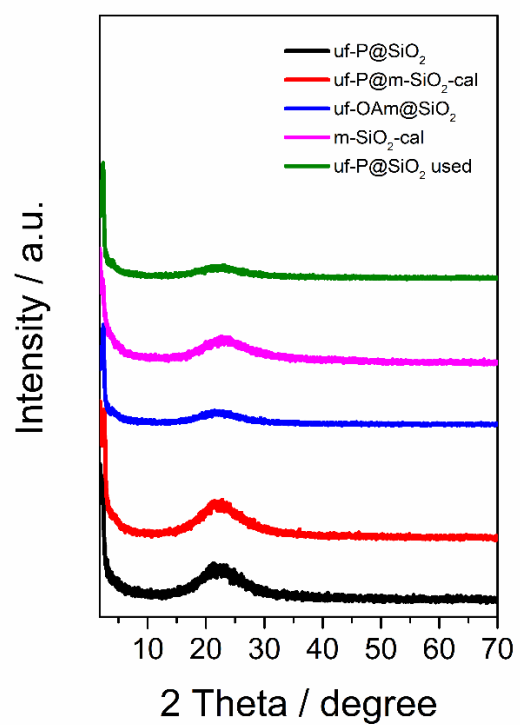

**Figure S1.** XRD patterns uf-P@m-SiO<sub>2</sub> (fresh and used), uf-P@m-SiO<sub>2</sub>-cal, uf-OAm@m-SiO<sub>2</sub>, and m-SiO<sub>2</sub>-cal.

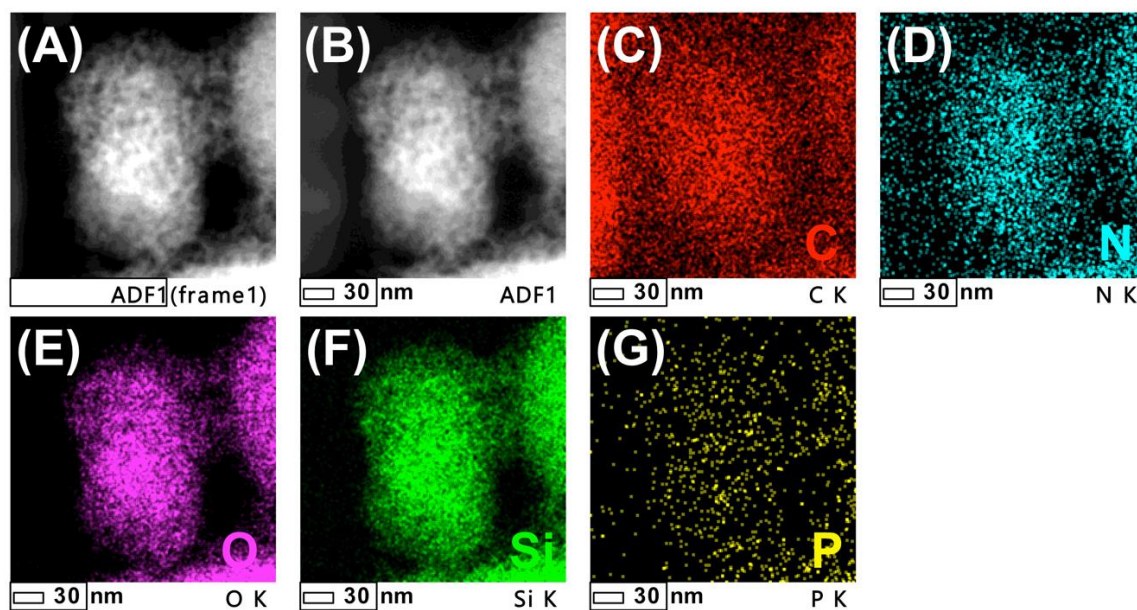

**Figure S2.** TEM elemental mapping of uf-P@m-SiO<sub>2</sub> (Position 2). (A,B) the TEM image of uf-P@m-SiO<sub>2</sub>, (C) the C element mapping, (D) the N element mapping, (E) the O element mapping, (F) the Si element mapping (G) the P element mapping.

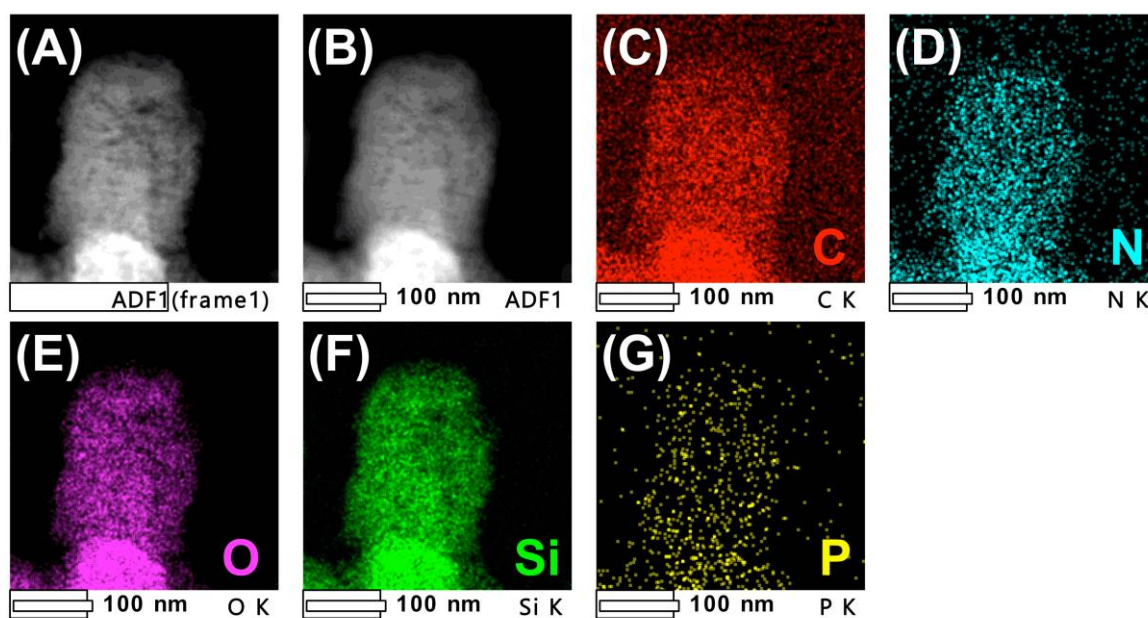

**Figure S3.** TEM elemental mapping of uf-P@m-SiO<sub>2</sub> (Position 3). (A,B) the TEM image of uf-P@m-SiO<sub>2</sub>, (C) the C element mapping, (D) the N element mapping, (E) the O element mapping, (F) the Si element mapping (G) the P element mapping.

### Position 1. (corresponding to Figure 5)

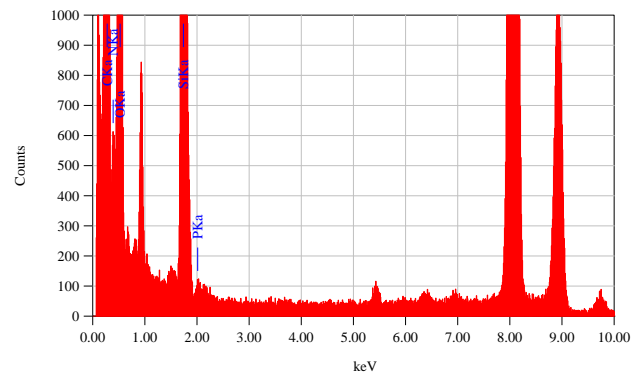

### Position 2. (corresponding to Figure S2)

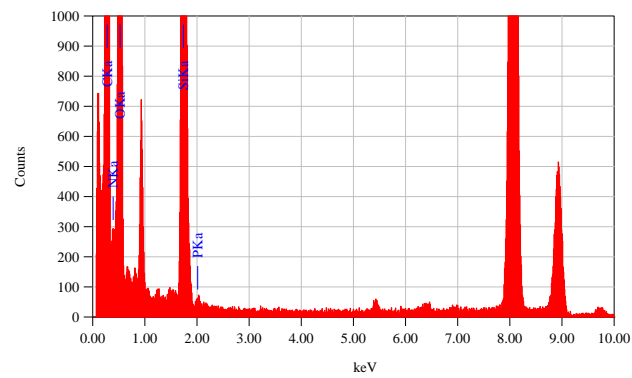

### Position 3. (corresponding to Figure S3)

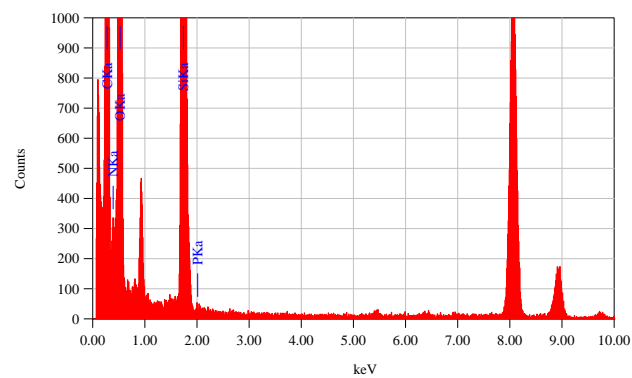

**Figure S4.** TEM-EDX total area spectrum recorded from the mapped area in Figure 5, Figure S2, and Figure S3 for the sample uf-P@m-SiO<sub>2</sub>.

**Table S2.** TEM-EDX elemental concentrations for uf-P@m-SiO<sub>2</sub>.

| Element | Atomic %   |            |            |
|---------|------------|------------|------------|
|         | Position 1 | Position 2 | Position 3 |
| C       | 74.97      | 70.53      | 67.31      |
| N       | 0.60       | 0.51       | 0.68       |
| O       | 16.83      | 19.87      | 22.41      |
| Si      | 7.57       | 9.05       | 9.58       |
| P       | 0.03       | 0.03       | 0.03       |

**Table S3.** Weisz-Prater Criterion and Mears Criterion calculation for the catalyst performance test.

| <b>Weisz-Prater Criterion</b>                                               |         |
|-----------------------------------------------------------------------------|---------|
| R (Catalyst particle radius, cm)                                            | 2.0E-02 |
| $\rho_c$ (catalyst density, g cm <sup>-3</sup> )                            | 1.6E-02 |
| $C_{As}$ (Gas concentration at the catalyst surface, mol cm <sup>-3</sup> ) | 4.5E-05 |
| $D_e$ (Effective diffusivity cm <sup>2</sup> s <sup>-1</sup> )              | 1.0E-05 |
| $r_{A\text{ obs}}$ (mol g <sup>-1</sup> s <sup>-1</sup> )                   | 1.0E-07 |
| $C_{wp}$                                                                    | 1.4E-02 |
| <b>Mears Criterion</b>                                                      |         |
| n (reaction order)                                                          | 1       |
| R (Catalyst particle radius, cm)                                            | 2.0E-02 |
| $\rho_b$ (bulk catalyst density, g cm <sup>-3</sup> )                       | 8.7E-01 |
| k <sub>c</sub> (mass transfer coefficient cm s <sup>-1</sup> )              | 5.3     |
| $C_{Ab}$ (bulk gas concentration mol cm <sup>-3</sup> )                     | 4.5E-05 |
| $r_{A\text{ obs}}$ (mol g <sup>-1</sup> s <sup>-1</sup> )                   | 1.0E-07 |
| $C_M$                                                                       | 7.4E-06 |

The Weisz-Prater Criterion is far below 1, and Mears Criterion is far below 0.15, so the diffusion of reactants to the catalyst were negligible. [16, 28-29]

**Table S4.** Comparison of the catalytic performance of different catalysts from literature of the SO<sub>2</sub> conversion to H<sub>2</sub>S, selectivity and yield of H<sub>2</sub>S.

| Catalyst                                              | T (°C) | SO <sub>2</sub> Conv. (%) | H <sub>2</sub> S Select. (%) | H <sub>2</sub> S Yield (%) | Reference |
|-------------------------------------------------------|--------|---------------------------|------------------------------|----------------------------|-----------|
| NiO/r-Al <sub>2</sub> O <sub>3</sub>                  | 320    | 98                        | 31                           | 30.4                       | [30]      |
| SnO <sub>2</sub> -ZrO <sub>2</sub>                    | 550    | 98                        | 45                           | 44.1                       | [31]      |
| Fe/γ-Al <sub>2</sub> O <sub>3</sub>                   | 240    | 100                       | 100                          | 100                        | [9]       |
| Fe-Si-Cr                                              | 190    | 100                       | 100                          | 100                        | [32]      |
| l-Ni <sub>5</sub> P <sub>4</sub> @SiO <sub>2</sub>    | 325    | 96                        | 99                           | 95                         | [17]      |
| u-Ni <sub>5</sub> P <sub>4</sub> @SiO <sub>2</sub> -l | 240    | 97                        | 34                           | 33                         | [17]      |
| uf-P@m-SiO <sub>2</sub>                               | 140    | 18                        | 6                            | 1                          | This work |
| uf-P@m-SiO <sub>2</sub>                               | 160    | 50                        | 8                            | 4                          | This work |
| uf-P@m-SiO <sub>2</sub>                               | 180    | 76                        | 33                           | 25                         | This work |
| uf-P@m-SiO <sub>2</sub>                               | 200    | 91                        | 39                           | 35                         | This work |
| uf-P@m-SiO <sub>2</sub>                               | 220    | 94                        | 52                           | 49                         | This work |
| uf-P@m-SiO <sub>2</sub>                               | 240    | 96                        | 52                           | 50                         | This work |

## References

- (1) Lu, X.; Baker, M. A.; Anjum, D. H.; et al. Ni<sub>2</sub>P Nanoparticles Embedded in Mesoporous SiO<sub>2</sub> for Catalytic Hydrogenation of SO<sub>2</sub> to Elemental S. *ACS Appl. Nano Mater.*, **2021**.
- (2) Basina, G.; Polychronopoulou, K.; Zedan, A. F.; Dimos, K.; Katsiotis, M. S.; Fotopoulos, A. P.; Ismail, I.; Tzitzios, V. Ultrasmall Metal-Doped CeO<sub>2</sub> Nanoparticles for Low-Temperature CO Oxidation. *ACS Appl. Nano. Mater.*, **2020**, *3*, 10805–10813.
- (3) Usman, M.; Li, D.; Li, C.; Zhang, S. Highly selective and stable hydrogenation of heavy aromatic-naphthalene over transition metal phosphides. *Sci. China Chem.*, **2015**, *58*, 738–746.
